# Supplementary material
Source: PubMed Central journal article supplement (PMC6615456)

# Chemical Genetics Reveals a Kinase-Independent Role For Protein Kinase R In Pyroptosis

Erik C. Hett, Louise H. Slater, Kevin G. Mark, Tomohiko Kawate, Brian G. Monks, Andrea Stutz, Eicke Latz, Deborah T. Hung

## SUPPLEMENTARY INFORMATION

### Supplementary Results

#### Supplementary Table 1

Compounds tested in standard LT-mediated macrophage cell death assay, mechanism of action, and max concentration of a serial dilution tested.

| <u>Compound</u> | <u>Mechanism</u>             | <u>Protection in LT assay</u>                | <u>Max concentration tested</u> |
|-----------------|------------------------------|----------------------------------------------|---------------------------------|
| Actinomycin D   | Inhibits transcription       | No                                           | 160 $\mu$ M                     |
| Cycloheximide   | Inhibits translation         | No                                           | 160 $\mu$ M                     |
| 2-AP            | Inhibits PKR kinase activity | No                                           | 6400 $\mu$ M                    |
| C16             | Inhibits PKR kinase activity | No                                           | 40 $\mu$ M                      |
| Geldanamycin    | Inhibits HSP90               | No                                           | 160 $\mu$ M                     |
| 17-AAG          | Inhibits HSP90               | No                                           | 160 $\mu$ M                     |
| 17-DMAG         | Inhibits HSP90               | No                                           | 160 $\mu$ M                     |
| Radicicol       | Inhibits HSP90               | Yes, but also inhibits ET and LFn-DTA assays | 160 $\mu$ M                     |

## Supplementary Table 2

Proteins detected from the pulldown experiment with **19**. Known MW of protein is indicated as well as the MW of the band sent for sequencing.

| <b>Protein</b> | <b>MW (kDa)</b> | <b>Band (kDa)</b> | <b>Function</b>                                                                             |
|----------------|-----------------|-------------------|---------------------------------------------------------------------------------------------|
| Ddx5           | 68              | 60                | DEAD box protein, putative RNA helicase, alteration of RNA secondary structure              |
| Eif2s3x        | 52              | 55                | Subunit of GTP-binding protein, recruitment of methionyl-tRNA(i) to 40S ribosome            |
| Hdac1          | 60              | 60                | Histone Deacetylase, removal of acetyl groups from lysine, transcriptional repression       |
| Lactb          | 55              | 60                | Large 39S subunit of the mitochondrial ribosome                                             |
| Rps4x          | 30              | 30                | Ribosomal protein S4, a component of the 40S subunit                                        |
| Sgpl1          | 63              | 60                | Cleaves sphingoid bases, stress-induced ceramide production and apoptosis                   |
| PKR            | 64              | 60                | Interferon-induced, double-stranded RNA-activated protein kinase, inhibits translation      |
| Prmt1          | 42              | 45                | Arginine methyltransferase, histone methyltransferase                                       |
| Ptbp1          | 57              | 60                | Pre-mRNA splicing, regulation of alternative splicing, binds to intron polypyrimidine tract |
| Ptbp2          | 57              | 60                | Pre-mRNA splicing, regulation of alternative splicing, binds to intron polypyrimidine tract |
| Stk3           | 56              | 60                | Stress-activated, pro-apoptotic kinase, induces chromatin condensation                      |

**Supplementary Table 3** Small molecule screening data

| Category            | Parameter                                | Description                                                                                                                            |
|---------------------|------------------------------------------|----------------------------------------------------------------------------------------------------------------------------------------|
| Assay               | Type of assay                            | Cell-based (J774A.1 macrophages)                                                                                                       |
|                     | Target                                   | Phenotypic                                                                                                                             |
|                     | Primary measurement                      | Survival, measured with Cell Titer Glo                                                                                                 |
|                     | Key reagents                             | Cell Titer Glo (Promega), LF and PA (LIST biological)                                                                                  |
|                     | Assay protocol                           | In Methods: Primary LT Assay Screen                                                                                                    |
|                     | Additional comments                      |                                                                                                                                        |
| Library             | Library size                             | 31,350 entities                                                                                                                        |
|                     | Library composition                      | Known bioactives, natural products, DOS compounds, commercially available drug-like compounds                                          |
|                     | Source                                   | Broad Institute                                                                                                                        |
|                     | Additional comments                      |                                                                                                                                        |
| Screen              | Format                                   | 384 well plates                                                                                                                        |
|                     | Concentration(s) tested                  | 33 m3 centration                                                                                                                       |
|                     | Plate controls                           | LFn positive control                                                                                                                   |
|                     | Reagent/ compound dispensing system      | nl pin robot                                                                                                                           |
|                     | Detection instrument and software        | Envision luminescence plate reader                                                                                                     |
|                     | Assay validation/QC                      | PosCon plate at beginning and ending of each screening day, check Z' factor                                                            |
|                     | Correction factors                       | None                                                                                                                                   |
|                     | Normalization                            | None, but analyzed each day separately due to potential variation in signal strength between screening days (screened 3 separate days) |
| Additional comments |                                          |                                                                                                                                        |
| Post-HTS analysis   | Hit criteria                             | >95% survival of cells, high reproducibility between replicates                                                                        |
|                     | Hit rate                                 | 0.5%                                                                                                                                   |
|                     | Additional assay(s)                      | Retested 8-point dose-response of each hit, tested against LFn-DTA, tested against ET, and many other assays described in the paper    |
|                     | Confirmation of hit purity and structure | Purchased or re-ordered compounds and retested in primary assay                                                                        |
|                     | Additional comments                      |                                                                                                                                        |

## Supplementary Figure 1

### 7DG does not inhibit LT entry or activity

a) EF entry was measured by taking J774 cells pretreated with compound for 2 hours before treating with ET (3 nM EF and 11 nM PA) for 5 hours. Lysate was then used in a competitive cAMP ELISA. High amounts of cAMP indicate effective EF cell entry (ConA 0.32  $\mu$ M and 7DG 40  $\mu$ M). b) LFn-DTA entry was determined by incubating J774 cells with indicated compounds and 0.1 nM LFn-DTA and 11nM PA for 24 hours. Cell survival was measured with CTG (7DG 5  $\mu$ M, Boc-D-CMK 5  $\mu$ M, ConA 0.04  $\mu$ M). c) Recombinant LF was diluted in buffer (100 nM final concentration), compound was added, then 10  $\mu$ M substrate (Ac-Gly-Tyr-bAla-Arg-Arg-Arg-Arg-Arg-Arg-Arg-Arg-Val-Leu-Arg-AMC, LF Substrate 3) was added and the amount of cleaved substrate was determined by measuring fluorescent output. Galardin is a known metalloprotease inhibitor. d) J774 macrophages were incubated with compound for 2 hours (7DG 20  $\mu$ M and ConA 1  $\mu$ M), then LT (LF 2 nM and PA 11 nM) was added and cells were incubated for 2 hours. Total cell lysates were made and probed with indicated antibodies by immunoblotting. e) J774 cell lysate was incubated with 7DG (40  $\mu$ M) or a known proteasome inhibitor control (Epoxo at 4  $\mu$ M), followed by the addition of synthetic proteasome substrates that fluoresce when cleaved by the specific protease *in vitro*. f) J774 cells were treated with different concentrations of compound for 2 hours and then incubated with the cell-permeable protease substrate: chymotrypsin-like: Suc-LLVY-aminoluciferin, caspase-like: Z-nLPnLD-aminoluciferin. After 30 minutes, luminescence was measured. A LT assay was conducted in parallel to determine the amount of protection from LT (cell survival measured using CTG). g) Active, recombinant mouse

caspase-1 was diluted in the provided buffer, followed by addition of compound and finally addition of CaspACE fluorometric substrate. The amount of substrate cleaved was determined by measuring fluorescent output (7DG 100  $\mu$ M and Z-YVAD-FMK 20  $\mu$ M). For all assays, data are representative of at least 3 independent experiments, each done in triplicate. Data in graphs are shown as mean +/- StDev. Note that some error bars are too small to see on graphs.

### **Supplementary Figure 2**

#### **SAR reveals critical regions of 7DG, and sites for biotinylation**

Synthesized and commercially available small molecules similar to 7DG were tested in the standard LT macrophage survival assay. IC<sub>50</sub>: concentration for 50% survival (**1** 7DG, **6** gedunin, **9** anthothecol, **19** biotinylated-analog).

### **Supplementary Figure 3**

#### **19 identifies PKR, which is confirmed with siRNA assays**

a) Biotin tethered 7-DG analog **19** was prepared from anthothecol (**9**) in the following 3 steps: *O*-methylation of enol with iodomethane followed by methanolysis with potassium carbonate in methanol and lastly esterification of the release alcohol with biotin (more details in supplementary notes section). b) J774 macrophages were incubated with compound for 2 hours, then LT (LF 2 nM and PA 11 nM) was added and cells were incubated for 2 hours. Total cell lysates were made and probed with indicated antibodies by immunoblotting. Concentrations: ConA 4  $\mu$ M, 7DG 10  $\mu$ M, **18** 20  $\mu$ M, **19** 5  $\mu$ M. c) Coomassie-stained SDS-PAGE gel containing proteins eluted from the pulldown with **19**.

Numbers indicate some of the bands that were cut and sent for sequencing. d) Full gel immunoblot from Fig. 3c. e) Full gel immunoblot from Fig. 3e. f) Three unique siRNA oligos targeting PKR were tested along with the upstream vATPase target as a positive control and J774 cells were tested for sensitivity to LT. g) Increasing amounts of siRNA targeting PKR were tested in J774 cells in the LT assay. h) Increasing amounts of siRNA (nM) targeting PKR were tested in J774 cells and caspase-1 activation was determined using FLICA reagent. Scale bar represents 75  $\mu$ m. i) J774 cells transfected with indicated siRNA (targeting PKR, nontargeting (NT) control, or vATPase) after 3 days were incubated with LT for 2 hours. Total cell lysates were made and probed with indicated antibodies by immunoblotting. For all assays, data are representative of at least 3 independent experiments, each done in triplicate. Data are shown as mean +/- StDev.

#### **Supplementary Figure 4**

a) J774 cells were treated with compound and LT for the indicated times, lysates were collected and probed by immunoblot (ConA 4  $\mu$ M, Boc-D-CMK 20  $\mu$ M, MG-132 10  $\mu$ M). MG-132 treatment results in cleavage of PKR into a smaller fragment and phosphorylation of uncleaved full-length PKR. b) J774 cells were pretreated with DMSO or 7DG (40  $\mu$ M) followed by incubation for 2 hours with a combination of PA and His-tagged catalytically inactive LF and then lysates were generated and LF-His was pulled down using cobalt resin and probed by immunoblot for PKR co-precipitation. Duplicates of this assay are shown. 'Sup' is the lysate supernatant before LF-His was incubated with the cobalt resin and represents the total amount of PKR that was available for co-precipitation. c) J774 cells were treated with compounds for 2 hours and treated with 10

ng/ml LPS for the indicated period of time. Lysates were probed by immunoblot for  $\text{I}\kappa\text{B}\beta$  and actin for loading control (7DG 20  $\mu\text{M}$  and Epoxo 4  $\mu\text{M}$ ). d) J774 cells were treated with media alone, 2nM LT, or 1 $\mu\text{g}/\text{ml}$  LPS for 2 hours, supernatants were collected, and amounts of  $\text{TNF}\alpha$  were determined using an ELISA assay. e) Immortalized mouse macrophages expressing NLRP3-FLAG and ASC-mCerulean were incubated with C16 inhibitor and specific stimuli, fixed with paraformaldehyde, counterstained with the nucleic acid stain DRAQ5, and visualized using microscopy to determine the percentage of cells that contain ASC specks. For all assays, data are representative of at least 3 independent experiments, each done in triplicate. Data are shown as mean +/- StDev.

## **Supplementary Figure 5**

**Synthesis of various analogs of 7DG.** Details in Supplementary Notes 1.

## **Supplementary Notes 1**

### **Synthesis of small molecules**

Anthothecol analogs **11~19** were synthesized from anthothecol **9** in one to three steps. Acetylation of anthothecol **9** provided acetate **16**, and methylation of **9** gave methyl ether **15**. Methanolysis of anthothecol **9** provided alcohol **11** along with methanol adduct **12**. Similarly, methanolysis of **15** gave alcohol **13** and methanol adduct **14**. Ethylation of alcohol **13** gave ethyl ether **17**. Esterification of alcohol **13** with valeric acid and *d*-biotin provided ester **18** and biotinylated analog **19**, respectively.

Synthesis of anthothecol analogs **11~19** (SFig4):

**General (synthesis):** Unless otherwise noted, reagents and solvents were obtained from commercial suppliers (Sigma-Aldrich, VWR, and Fisher Thermo Scientific) and were used as received. Compounds **1, 3, 4, 6, 7** and **9** were purchased from Gaia Chemical Co. Compounds **2, 5** and **10** were purchased from Spectrum. Compound **8** was purchased from Analyticon. Column chromatography was performed using EMD silica gel 60 (230-400 mesh). NMR spectra were recorded on Bruker 300 system, <sup>1</sup>H-NMR at 300MHz and <sup>13</sup>C-NMR at 75 MHz. Chemical shifts are reported in parts per million (ppm,  $\delta$ ) downfield from tetramethylsilane (TMS). Coupling constants (*J*) are reported in Hz. Spin multiplicities are described as s (singlet), brs (broad singlet), t (triplet), q (quartet), and m (multiplet). LC/MS analysis was conducted on a Agilent Poroshell 120 EC-C18 column (3.0 x 30mm, 2.7  $\mu$ m), eluting with 0.01% formic acid in water (solvent A) and 0.01% formic acid in acetonitrile (solvent B), using the following elution gradient: 0.0 min (5% B)-1.75 min (95% B)-2.25 min (95% B)-2.27 min (5% B)-2.5 min (5% B) at a flow rate of 1.75 mL/min. HPLC purity was assessed by integration of peak areas at 254nm. The mass spectra were recorded in electrospray positive ion modes (ESI+) on a Waters ZQ mass spectrometer.

**Methanolysis of anthothecol (Synthesis of alcohol 11 and methanol adduct 12):**

To a solution of anthothecol **9** (22.7 mg, 47  $\mu$ mol) in methanol (10 mL) was added K<sub>2</sub>CO<sub>3</sub> (10.6 mg, 77  $\mu$ mol) and the mixture was stirred at room temperature for 22h. The mixture was evaporated and redissolved with chloroform, washed with water and Brine and dried over Na<sub>2</sub>SO<sub>4</sub> and evaporated. The residue was chromatographed on silica gel



(AcOEt:hexanes=1:3) to give alcohol **11** (9 mg, 43% yield) and methanol adduct **12** (9 mg, 41% yield). Alcohol **11**:  $^1\text{H}$  NMR (300 MHz,  $\text{CDCl}_3$ )  $\delta$  7.73 (d,  $J = 10.0$ , 1H), 7.38 (s, 1H), 7.16 (s, 1H), 6.36 (s, 1H), 6.19 (s, 1H), 6.03 (d,  $J = 9.9$ , 1H), 4.58 – 4.36 (m, 1H), 3.80 (s, 1H), 2.88 (d,  $J = 11.1$ , 1H), 2.78 (dd,  $J = 11.1$ , 6.4, 1H), 2.44 (dd,  $J = 12.7$ , 6.8, 1H), 2.32 (dd,  $J = 13.6$ , 6.5, 1H), 1.94 (dd,  $J = 13.5$ , 11.2, 1H), 1.77 (d,  $J = 3.7$ , 1H), 1.65 (dd,  $J = 12.8$ , 9.2, 1H), 1.58 (s, 3H), 1.54 (s, 3H), 1.50 (s, 3H), 1.16 (s, 3H), 0.79 (s, 3H). ESIMS  $m/z$  +43.10. Rt 1.48 min, purity >95%. Compound **12**:  $^1\text{H}$  NMR (300 MHz,  $\text{CDCl}_3$ )  $\delta$  7.38 (s, 1H), 7.16 (s, 1H), 6.27 (s, 1H), 6.19 (s, 1H), 4.51 (dd,  $J = 4.8$ , 1.4, 1H), 4.47 – 4.31 (m, 1H), 3.79 (s, 1H), 3.41 – 3.28 (m, 4H), 2.81 – 2.74 (m, 1H), 2.71 (t,  $J = 6.3$ , 2H), 2.34 (ddd,  $J = 19.8$ , 13.1, 6.6, 2H), 1.95 (dd,  $J = 13.2$ , 11.5, 1H), 1.67 – 1.48 (m, 5H), 1.42 (s, 3H), 1.31 – 1.18 (m, 3H), 1.13 (s, 3H), 0.82 (s, 3H). ESIMS  $m/z$  +471.15. Rt 1.47 min, purity >90%.

#### **Acetylation of antheocol (Synthesis of $O^{11}$ -acetyl-antheocol 16):**

A mixture of antheocol **9** (8.8 mg, 18  $\mu\text{mol}$ ), acetic anhydride (17  $\mu\text{L}$ , 180  $\mu\text{mol}$ ) in pyridine (0.2 mL) was stirred at room temperature for 40 h. The mixture was evaporated and the residue was chromatographed on silica gel (AcOEt:hexanes=1:5) to give acetate **16** (7.1 mg, 74% yield).  $^1\text{H}$  NMR (300 MHz,  $\text{CDCl}_3$ )  $\delta$  7.49 (d,  $J = 9.6$ , 1H), 7.36 (d,  $J = 0.8$ , 1H), 7.14 (s, 1H), 6.16 (s, 1H), 6.14 (d,  $J = 10.2$ , 1H), 5.48 (dd,  $J = 19.2$ , 8.2, 1H), 3.74 (s, 1H), 3.13 (d,  $J = 10.5$ , 1H), 2.81 (dd,  $J = 10.8$ , 6.5, 1H), 2.61 (dd,  $J = 12.8$ , 7.1, 1H), 2.37 – 2.23 (m, 4H), 2.12 (s, 3H), 2.00 – 1.84 (m, 1H), 1.52 (t,  $J = 10.7$ , 4H), 1.41 (s, 6H), 1.28 (s, 3H), 0.81 (s, 3H).  $^{13}\text{C}$  NMR (75 MHz,  $\text{CDCl}_3$ )  $\delta$  201.96, 169.51, 168.77,

154.27, 143.24, 139.68, 127.00, 122.89, 110.80, 69.85, 56.22, 49.43, 43.40, 41.86, 41.63, 31.92, 28.20, 24.30, 22.97, 21.58, 20.83. ESIMS  $m/z$  +523.17. Rt 1.62 min, purity >95%.

**Methylation of anthothecol (Synthesis of  $O^6$ -methyl-anthothecol **15**):**

A mixture of anthothecol **9** (35 mg, 73  $\mu$ mol),  $K_2CO_3$  (16.9 mg, 122  $\mu$ mol) and iodomethane (91  $\mu$ L, 1.46 mmol) in acetone (2 mL) was stirred at 50°C for 32 h. The mixture was cooled to room temperature and diluted with AcOEt, washed with brine, dried over  $Na_2SO_4$  and evaporated. The residue was chromatographed on silica gel (AcOEt:hexanes=1:5) to give methyl ether **15** (44 mg, quantitative).  $^1H$  NMR (300 MHz,  $CDCl_3$ )  $\delta$  7.42 (d,  $J$  = 9.9, 1H), 7.36 (s, 1H), 7.15 (s, 1H), 6.17 (s, 1H), 6.10 (d,  $J$  = 9.9, 1H), 5.45 (ddd,  $J$  = 16.3, 12.2, 6.7, 1H), 3.69 (s, 3H), 3.08 (d,  $J$  = 11.6, 1H), 2.80 (dd,  $J$  = 10.8, 6.8, 1H), 2.60 (dd,  $J$  = 12.9, 7.2, 1H), 2.31 (dd,  $J$  = 13.6, 6.4, 1H), 2.10 (s, 4H), 1.96 (dd,  $J$  = 13.1, 11.3, 1H), 1.58 (d,  $J$  = 2.4, 1H), 1.53 (s, 3H), 1.51 (s, 3H), 1.33 (s, 3H), 1.20 (s, 3H), 0.83 (s, 3H).  $^{13}C$  NMR (75 MHz,  $CDCl_3$ )  $\delta$  195.88, 169.54, 154.30, 147.48, 146.22, 143.18, 139.63, 126.82, 122.91, 110.76, 69.90, 68.70, 60.49, 59.03, 56.32, 49.86, 48.22, 45.19, 43.31, 41.79, 41.61, 41.10, 31.90, 28.22, 24.28, 22.98, 22.67, 21.53, 20.03. ESIMS  $m/z$  +495.16. Rt 1.64 min, purity >95%.

**Methanolysis of  $O^6$ -methyl-anthothecol **15** (Synthesis of deacetyl  $O^6$ -methyl-anthothecol **13** and methanol adduct **14**):**

To a solution of methyl ether **15** (9.5 mg, 19  $\mu$ mol) in methanol (2 mL) was added 50 mM  $K_2CO_3$  in methanol (0.8 mL) and the whole was stirred at room temperature for 3 h. Acetic acid (3  $\mu$ L) was added and the mixture was evaporated to dryness. The residue

was chromatographed on silica gel (AcOEt:hexanes=1:3) to give deacetylated compound **13** (4.5 mg, 52% yield) and methanol adduct **14** (1.6 mg, 17% yield). Compound **13**:  $^1\text{H}$  NMR (300 MHz,  $\text{CDCl}_3$ )  $\delta$  7.64 (d,  $J = 9.9$ , 1H), 7.38 (s, 1H), 7.16 (s, 1H), 6.19 (s, 1H), 6.04 (d,  $J = 9.9$ , 1H), 4.53 – 4.38 (m, 1H), 3.68 (s, 3H), 2.88 (d,  $J = 11.0$ , 1H), 2.77 (dd,  $J = 11.2$ , 6.3, 1H), 2.44 (dd,  $J = 12.7$ , 6.9, 1H), 2.31 (dd,  $J = 13.6$ , 6.3, 1H), 2.06 – 1.89 (m, 1H), 1.68 (d,  $J = 3.6$ , 1H), 1.61 (dd,  $J = 12.0$ , 2.9, 1H), 1.55 (s, 3H), 1.53 (s, 3H), 1.51 (s, 3H), 1.17 (s, 3H), 0.81 (s, 3H). ESIMS  $m/z$  +453.17. Rt 1.51 min, purity 88%. Compound **14**:  $^1\text{H}$  NMR (300 MHz,  $\text{CDCl}_3$ )  $\delta$  7.37 (s, 1H), 7.15 (s, 1H), 6.19 (s, 1H), 4.46 (dd,  $J = 4.8$ , 2.0, 1H), 4.42 – 4.31 (m, 1H), 3.71 (s, 1H), 3.66 (s, 3H), 3.37 (s, 1H), 3.33 (s, 3H), 2.76 (dd,  $J = 10.9$ , 6.7, 1H), 2.71 – 2.65 (m, 2H), 2.42 – 2.34 (m, 1H), 2.28 (dd,  $J = 9.7$ , 4.0, 1H), 1.98 (dd,  $J = 13.1$ , 11.4, 1H), 1.54 – 1.47 (m, 5H), 1.41 (s, 3H), 1.23 (s, 3H), 1.14 (s, 3H), 0.85 (s, 3H). ESIMS  $m/z$  +485.15. Rt 1.52 min, purity >95%.

#### **Synthesis of $O^{11}$ -ethyl-deacetyl- $O^6$ -methyl-anthothecol **17**:**

To a suspension of NaH (1.7 mg, 60% oil dispersion, 49  $\mu\text{mol}$ ) in THF (0.2 mL) was added a solution of alcohol **13** (6.6 mg, 15  $\mu\text{mol}$ ) in THF (0.3 mL) and the mixture was stirred at room temperature for 5 min. Iodoethane (2.5  $\mu\text{L}$ , 31  $\mu\text{mol}$ ) was added and the whole was stirred at room temperature for 10 h and then stirred at 30°C. After 11 h and 18 h at 30°C, additional iodoethane (2.5  $\mu\text{L}$  and 5  $\mu\text{L}$ , respectively) was added. After stirred 61 h at 30°C, the mixture was evaporated. The residue was chromatographed on silica gel (AcOEt:hexanes=1:10) to give ethyl ether **17** (1.9 mg, 27% yield).  $^1\text{H}$  NMR (300 MHz,  $\text{CDCl}_3$ )  $\delta$  7.61 (d,  $J = 9.9$ , 1H), 7.38 (s, 1H), 7.16 (s, 1H), 6.21 (s, 1H), 6.00 (d,  $J = 9.9$ , 1H), 3.94 (ddd,  $J = 10.9$ , 8.9, 6.9, 1H), 3.83 – 3.71 (m, 2H), 3.68 (s, 3H), 3.38

(dt,  $J = 15.7, 7.1$ , 1H), 2.91 (d,  $J = 11.0$ , 1H), 2.75 (dd,  $J = 11.0, 6.3$ , 1H), 2.57 (dd,  $J = 12.8, 6.7$ , 1H), 2.30 (dd,  $J = 13.6, 6.4$ , 1H), 1.97 (dd,  $J = 13.4, 11.2$ , 1H), 1.53 (s, 3H), 1.50 (s, 3H), 1.45 (s, 3H), 1.35 – 1.27 (m, 2H), 1.21 (t,  $J = 6.9$ , 3H), 1.16 (s, 3H), 0.92 – 0.82 (m, 2H), 0.80 (s, 3H). ESIMS  $m/z$  +479.19. Rt 1.86 min, purity >90%.

### **Synthesis of $O^{11}$ -valeroyl-deacetyl- $O^6$ -methyl-anthothecol **18**:**

To a solution of valeric acid (1  $\mu$ L, 9.2  $\mu$ mol) in DMF (0.1 mL) was added a solution of alcohol **13** (3.3 mg, 7.3  $\mu$ mol) in  $\text{CH}_2\text{Cl}_2$  (0.1 mL) and a solution of ethyl 3-dimethylaminopropyl-carbodiimide hydrochloride (EDCI) in  $\text{CH}_2\text{Cl}_2$  (0.2 M, 46  $\mu$ L, 9.2  $\mu$ mol of EDCI) and the mixture was stirred at room temperature for 5 min. A solution of 4-dimethylamino-pyridine (DMAP) in  $\text{CH}_2\text{Cl}_2$  (0.2 M, 5  $\mu$ L, 1  $\mu$ mol of DMAP) was added and the whole was stirred at room temperature. After 20 h, additional valeric acid (2  $\mu$ L, 18.4  $\mu$ mol) and 0.2 M EDCI in  $\text{CH}_2\text{Cl}_2$  (92  $\mu$ L, 18.4  $\mu$ mol of EDCI) were added. After stirred another 50 h, the mixture was evaporated. The residue was chromatographed on silica gel (AcOEt:hexanes=1:9~1:4) to give valeroyl ester **18** (2.5 mg, 64% yield) as colorless caramel.  $^1\text{H}$  NMR (300 MHz,  $\text{CDCl}_3$ )  $\delta$  7.43 (d,  $J = 9.9$ , 1H), 7.36 (s, 1H), 7.15 (s, 1H), 6.17 (s, 1H), 6.10 (d,  $J = 9.9$ , 1H), 5.45 (ddd,  $J = 11.4, 8.7, 7.2$ , 1H), 3.75 (s, 1H), 3.69 (s, 3H), 3.08 (d,  $J = 11.7$ , 1H), 2.81 (dd,  $J = 10.6, 6.6$ , 1H), 2.60 (dd,  $J = 13.0, 7.1$ , 1H), 2.43 – 2.23 (m, 3H), 1.96 (dd,  $J = 13.1, 11.2$ , 1H), 1.64 (dt,  $J = 13.8, 5.3$ , 2H), 1.54 (s, 3H), 1.52 – 1.43 (m, 4H), 1.41 – 1.34 (m, 2H), 1.33 (s, 3H), 1.20 (s, 3H), 0.98 – 0.85 (m, 3H), 0.83 (s, 3H). ESIMS  $m/z$  +537.24. Rt 1.88 min, purity >90%.

### Synthesis of *O*<sup>11</sup>-*d*-biotinyl-deacetyl-*O*<sup>6</sup>-methyl-anthothecol **19**:

To a mixture of alcohol **13** (12.9 mg, 28.5  $\mu$ mol) and *d*-biotin (16.9 mg, 69  $\mu$ mol) in DMF (0.5 mL) was added a 0.5 M solution of EDCI in DMF (140  $\mu$ l, 70  $\mu$ mol of EDCI) and the mixture was stirred at room temperature for 5 min. A 0.2 M solution of DMAP in CH<sub>2</sub>Cl<sub>2</sub> (70  $\mu$ L, 14  $\mu$ mol of DMAP) was added and the whole was stirred at room temperature. After stirred for 68 h, the mixture was evaporated. The residue was chromatographed on silica gel (AcOEt:hexanes=1:3 then CHCl<sub>3</sub>:MeOH=49:1~48:2) to give biotinyl ester **19** (8.9 mg, 46% yield, colorless film) and recovered alcohol **13** (6.6 mg, 51% recovery). Compound **19**: <sup>1</sup>H NMR (300 MHz, CDCl<sub>3</sub>)  $\delta$  7.42 (d, *J* = 9.9, 1H), 7.36 (s, 1H), 7.16 (s, 1H), 6.18 (s, 1H), 6.14 (d, *J* = 9.9, 1H), 5.78 (s, 1H), 5.45 (dt, *J* = 11.3, 8.0, 1H), 5.17 (s, 1H), 4.59 – 4.46 (m, 1H), 4.38 – 4.25 (m, 1H), 3.75 (s, 1H), 3.69 (s, 3H), 3.16 (dd, *J* = 12.4, 6.7, 1H), 3.09 (d, *J* = 11.6, 1H), 2.96 (dd, *J* = 12.9, 5.0, 1H), 2.85 – 2.78 (m, 1H), 2.75 (d, *J* = 13.0, 1H), 2.59 (dd, *J* = 13.0, 7.2, 1H), 2.47 – 2.21 (m, 3H), 2.03 – 1.89 (m, 1H), 1.83 – 1.58 (m, 6H), 1.52 (d, *J* = 8.3, 7H), 1.32 (s, 3H), 1.20 (s, 3H), 0.83 (s, 3H). ESIMS *m/z* +679.37. Rt 1.52 min, purity >95%.

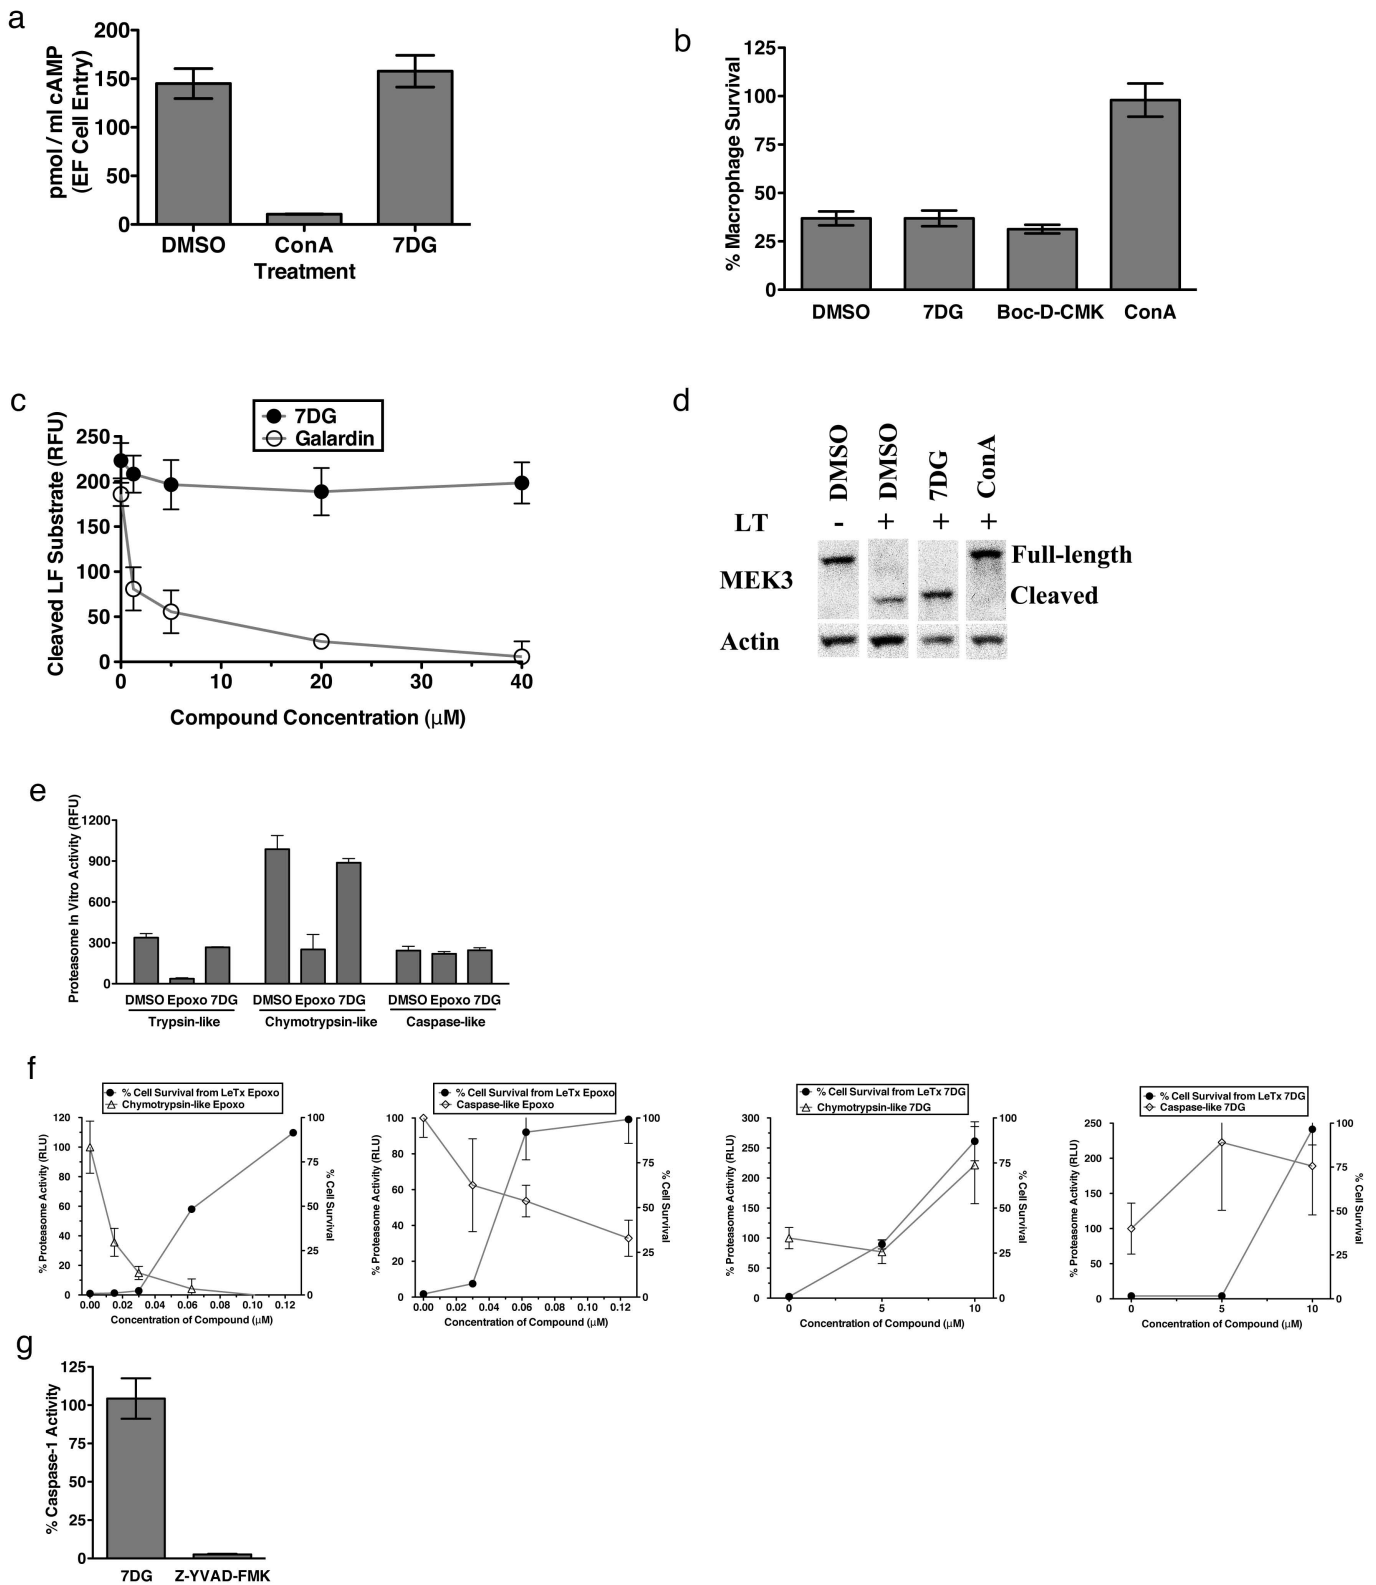

Supp Fig 2

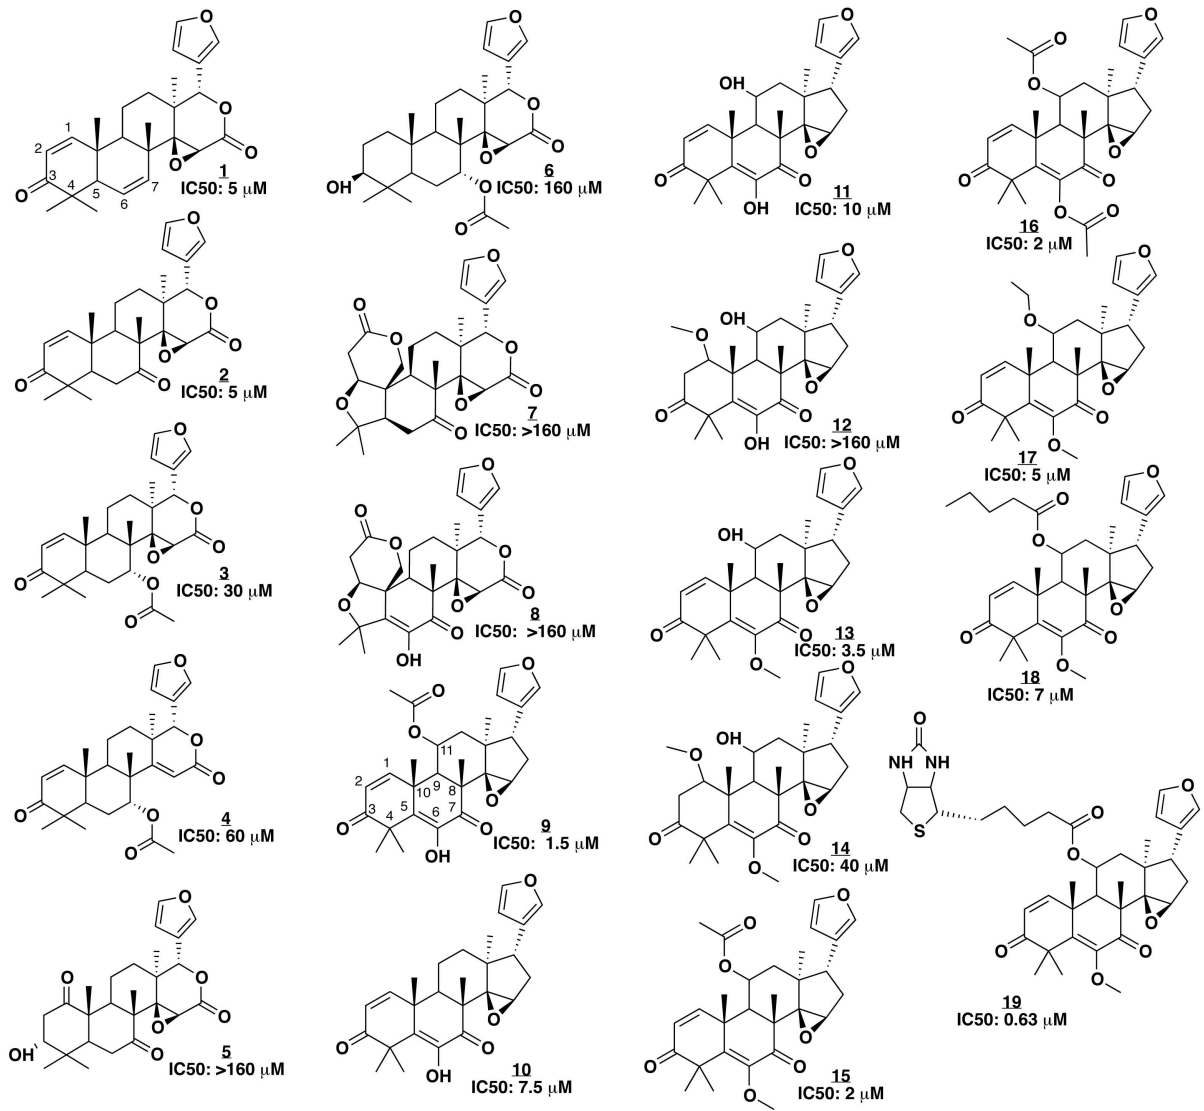

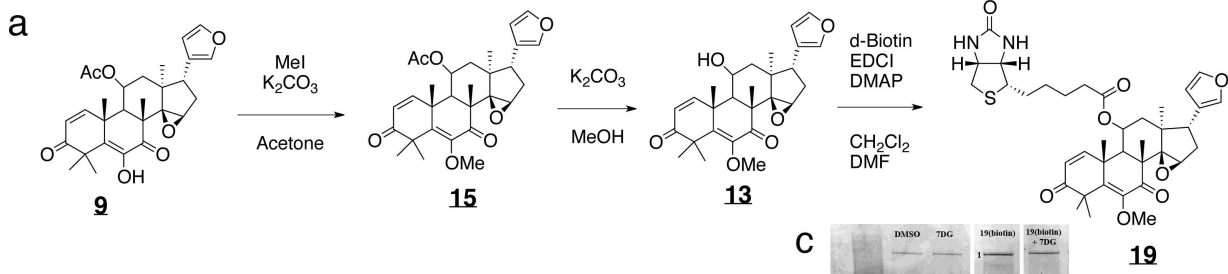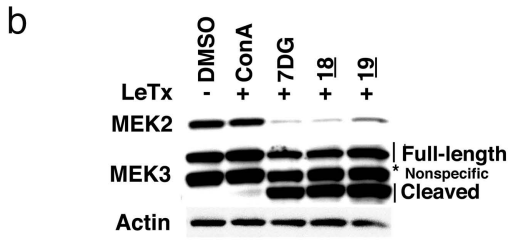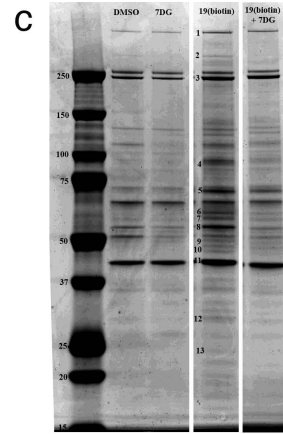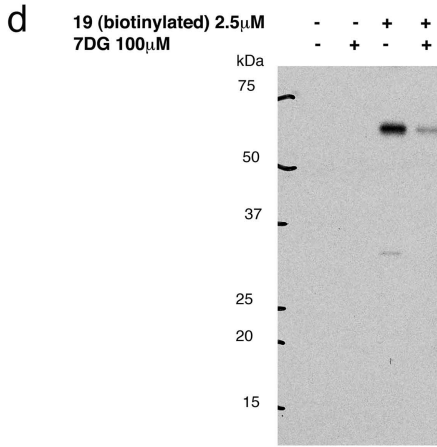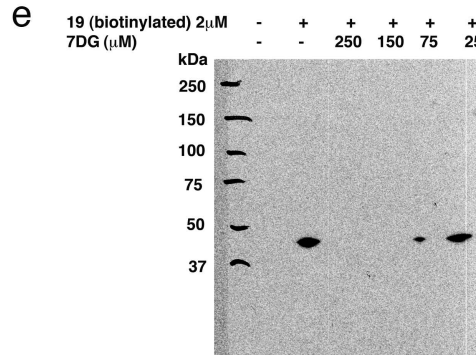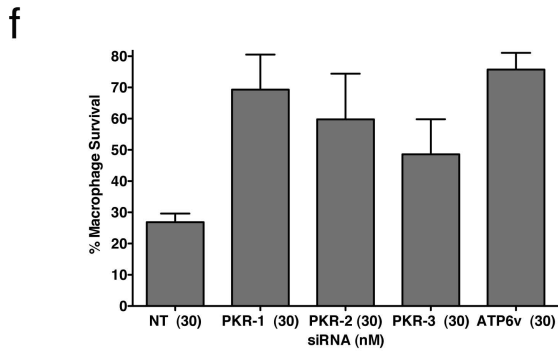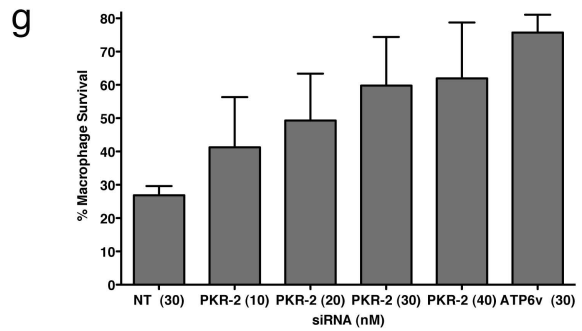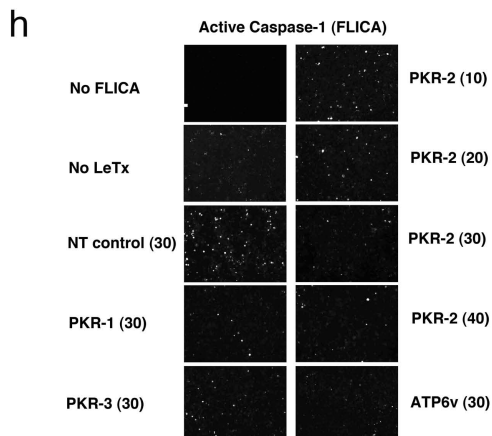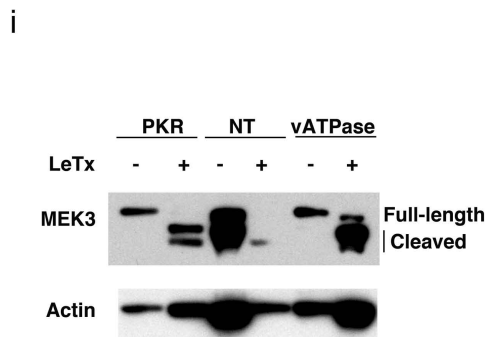



a

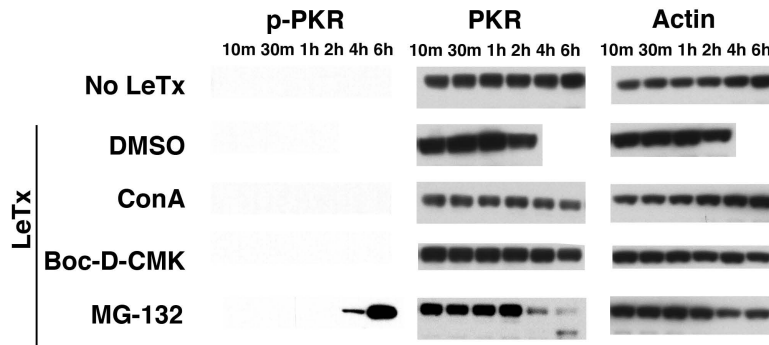

b

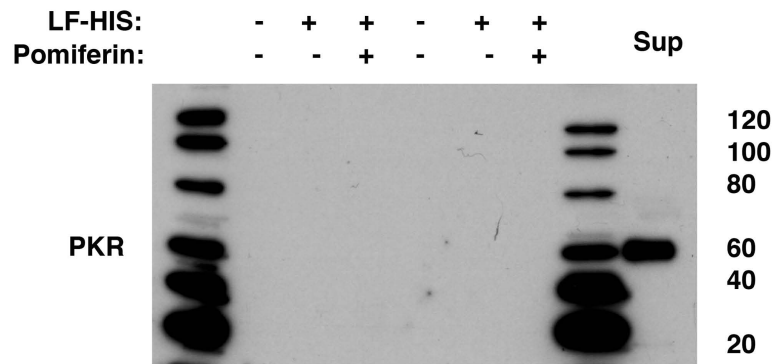

c

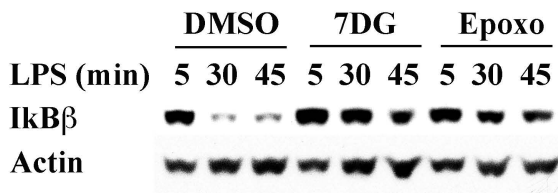

d

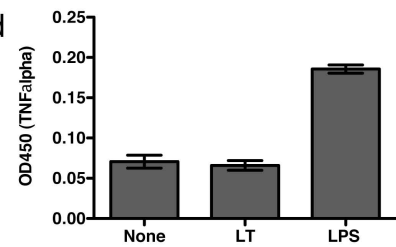

e

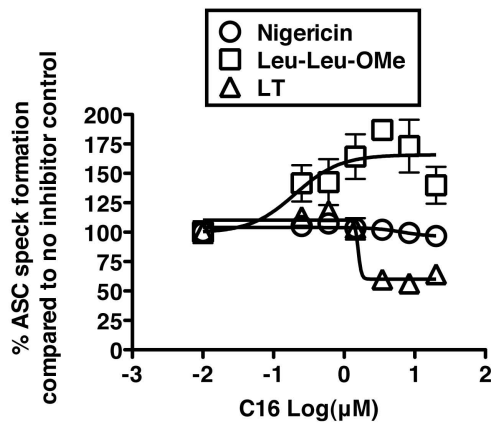

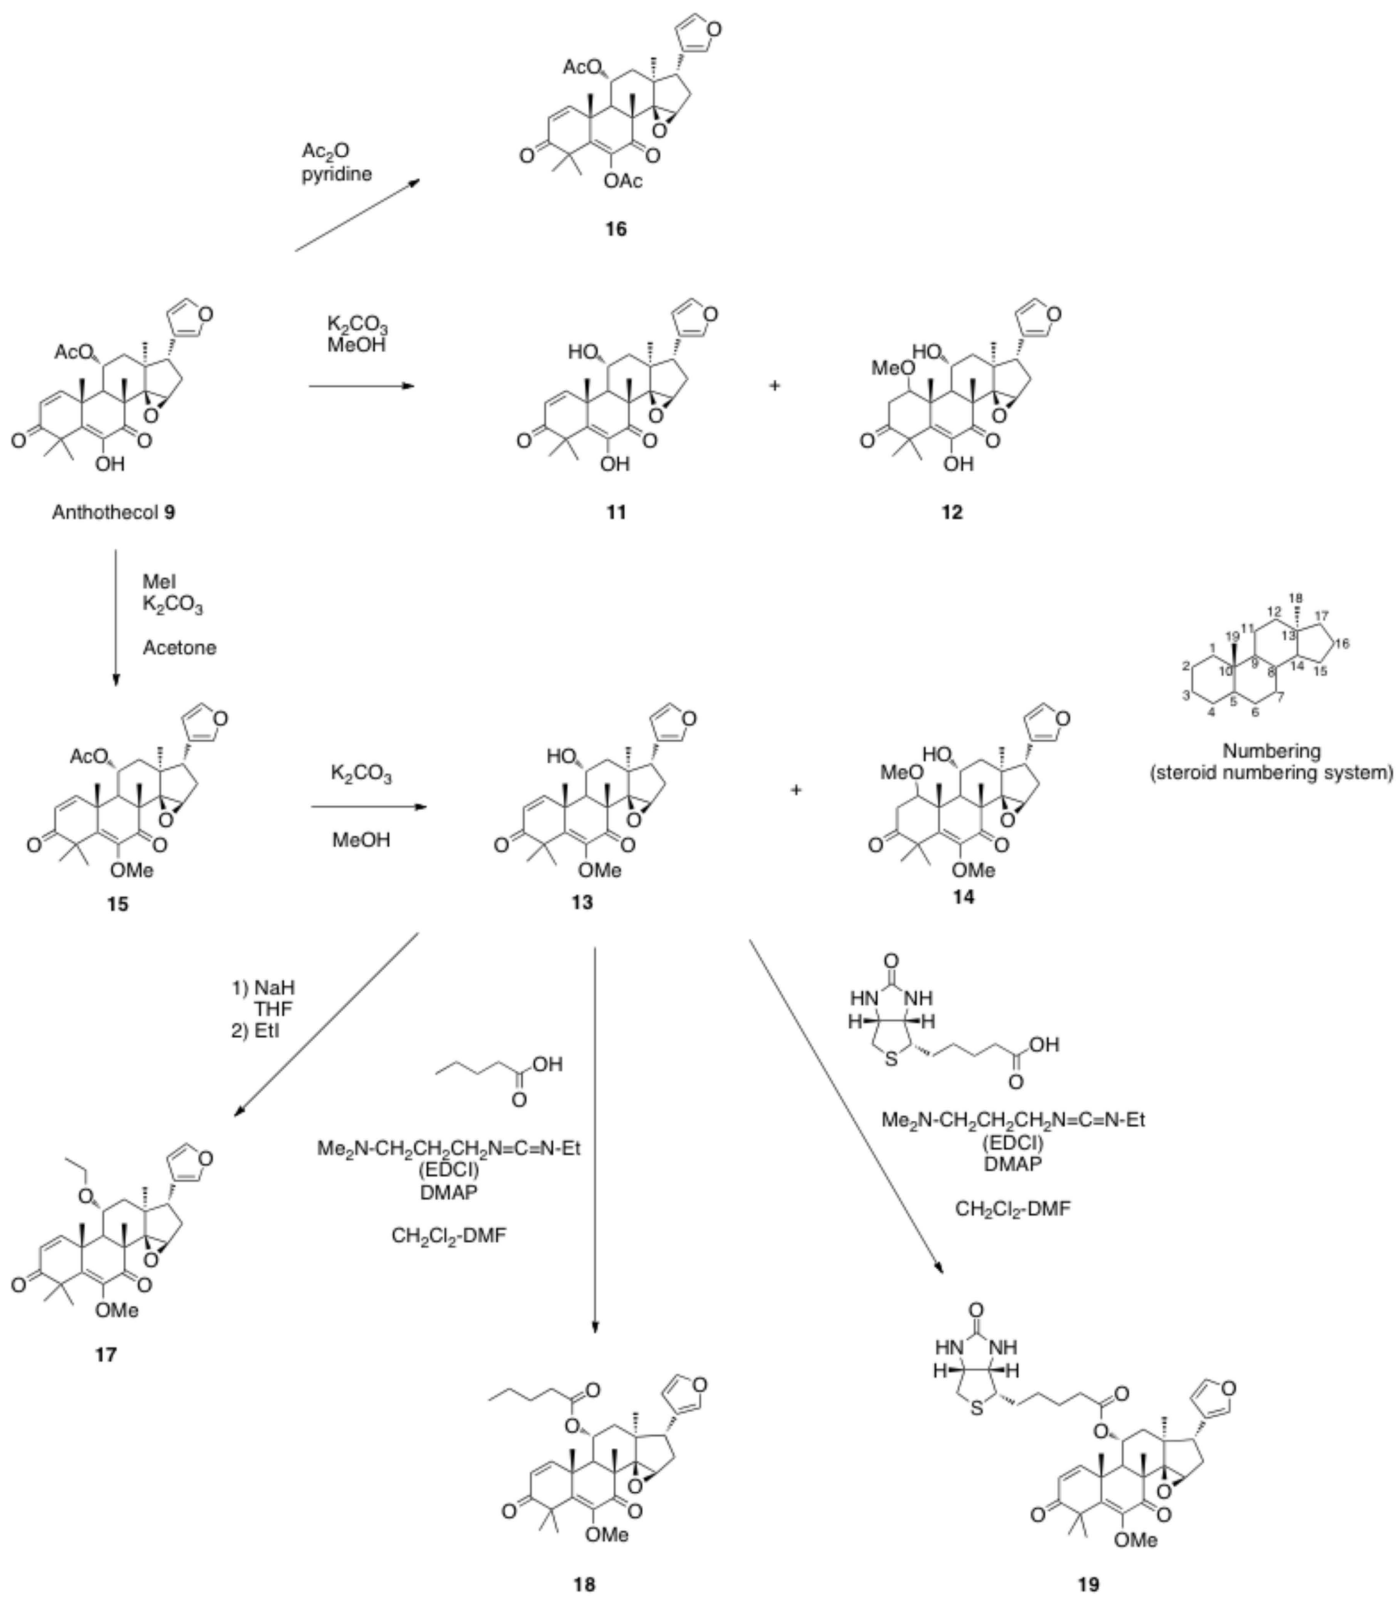

Supplement: NIHMS1038859-supplement-Supplemental_Files.pdf [file NIHMS1038859-supplement-Supplemental_Files.pdf]
